# Supplementary material for: Transient peak-strain matching partially recovers the age-impaired mechanoadaptive cortical bone response
Source: PubMed Central journal article supplement (PMC5924380; doi:10.1038/s41598-018-25084-6), 2018-04-27
Supplement: 41598_2018_25084_MOESM1_ESM.pdf [file 41598_2018_25084_MOESM1_ESM.pdf]

## **Transient peak-strain matching partially recovers the age-impaired mechanoadaptive cortical bone response**

**Behzad Javaheri<sup>1,\*</sup>, Alessandra Carriero<sup>2</sup>, Maria Wood<sup>1</sup>, Roberto De Souza<sup>3</sup>, Peter D. Lee<sup>4</sup>, Sandra Shefelbine<sup>5</sup> and Andrew A. Pitsillides<sup>1</sup>**

<sup>1</sup> Skeletal Biology Group, Comparative Biomedical Sciences, The Royal Veterinary College, Royal College Street, London, NW1 0TU, UK

<sup>2</sup> The City College of New York, Department of Biomedical Engineering, 160 Convent Avenue, New York, NY 10031, USA

<sup>3</sup> Universidade Federal de Mato Grosso (UFMT), Departamento de Clínica, Av. Fernando Corrêa da Costa, 2367 - Boa Esperança, Cuiabá, 78060-900, Brazil

<sup>4</sup> Manchester X-Ray Imaging Facility, University of Manchester, Research Complex at Harwell, RAL, Didcot, OX11 0FA, UK

<sup>5</sup> Department of Mechanical and Industrial Engineering, Northeastern University, 360 Huntington Ave, Boston, MA 02115, USA

[\\*bjavaheri@rvc.ac.uk](mailto:bjavaheri@rvc.ac.uk)

## Supplementary information

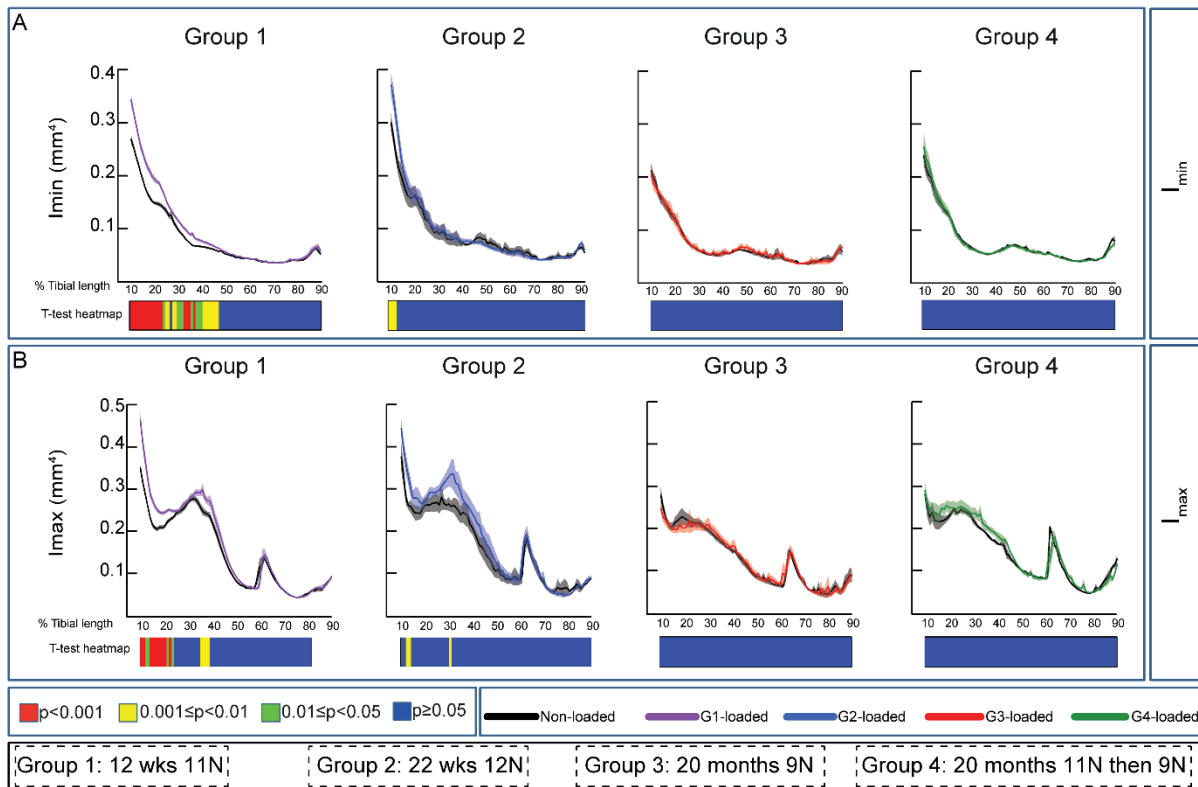

**Figure 6. Analysis of  $I_{min}$  and  $I_{max}$  along the entire length of the tibia.** (A) Mean  $I_{min}$  of control and loaded tibiae of female C57/B16 at 12 and 22 weeks as well as 20 months of age. (B) Mean  $I_{max}$  of control and loaded tibiae of female C57/B16 at various ages. Statistical significance of differences in CSA and thickness between control and loaded tibiae along the entire tibial shaft, represented as a heat map. Red  $p < 0.001$ , yellow  $0.001 \leq p < 0.01$ , green  $0.01 \leq p < 0.05$  and blue  $p \geq 0.05$ . Group sizes were  $n = 8$  for groups 1-3 and 4 for group 4 respectively. Group 1: 12 week-old loaded at 11N; group 2: 22 week-old loaded at 12N; group 3: 20 month loaded at 9N and group 4: 20 months old subjected to two episodes of 11N followed by two weeks of 9N. Line graphs represent means  $\pm$  SEM.

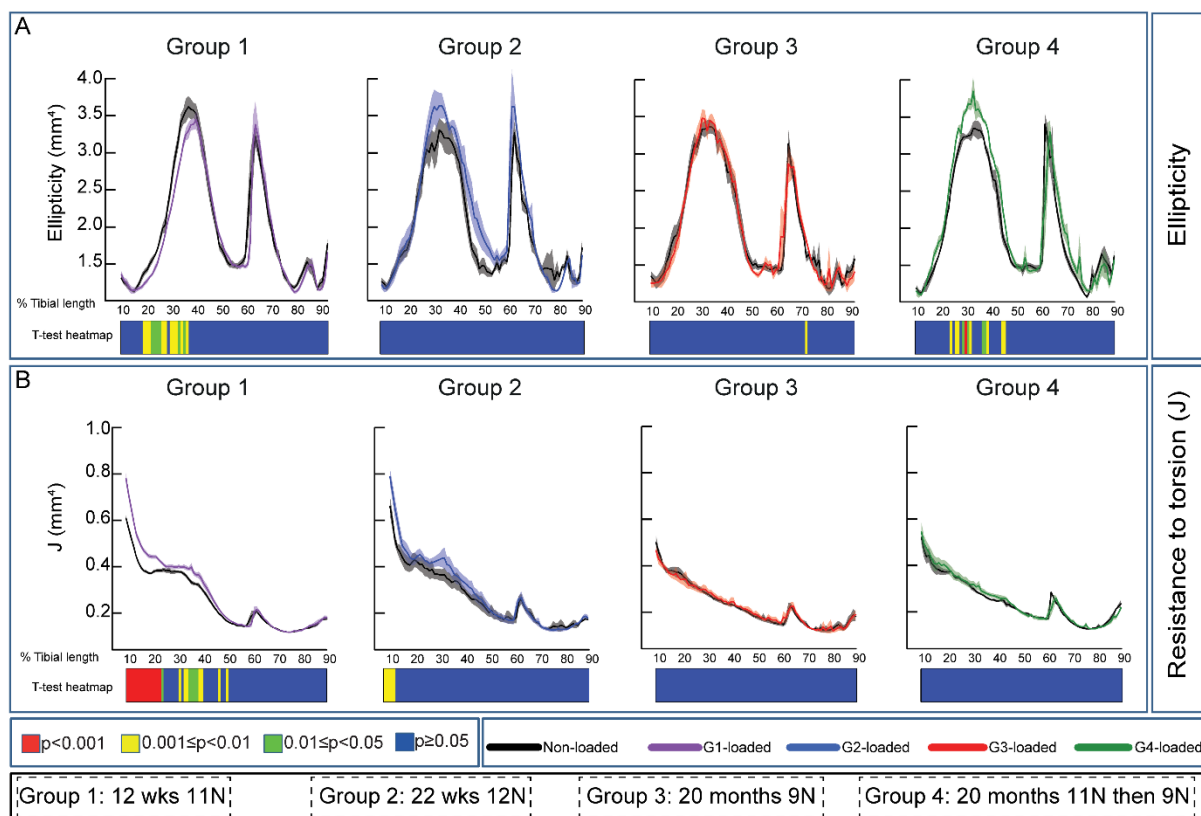

**Figure 7. Analysis of ellipticity and predicted resistance to torsion (J) along the entire length of the tibia.** (A) Ellipticity of control and loaded tibiae of female C57/B16 at 12 and 22 weeks as well as 20 months of age. (B) Predicted J in control and loaded tibiae of female C57/B16 at various ages. Statistical significance of differences in CSA and thickness between control and loaded tibiae along the entire tibial shaft, represented as a heat map. Red  $p < 0.001$ , yellow  $0.001 \leq p < 0.01$ , green  $0.01 \leq p < 0.05$  and blue  $p \geq 0.05$ . Group sizes were  $n = 8$  for groups 1-3 and 4 for group 4 respectively. Group 1: 12 week-old loaded at 11N; group 2: 22 week-old loaded at 12N; group 3: 20 month loaded at 9N and group 4: 20 months old subjected to two episodes of 11N followed by two weeks of 9N. Line graphs represent means  $\pm$  SEM.
